# Supplementary material for: Genetic Architecture of Micro-Environmental Plasticity in Drosophila melanogaster
Source: PubMed Central journal article supplement (PMC4421828; doi:10.1038/srep09785), 2015-05-06
Supplement: srep09785-s1.pdf [file srep09785-s1.pdf]

**Supplementary information**

**Genetic Architecture of Micro-Environmental  
Plasticity in *Drosophila melanogaster***

Fabio Morgante, Peter Sørensen, Daniel A. Sorensen,

Christian Maltecca and Trudy F. C. Mackay

**Fig. S1| Density plots showing skewed distributions of  $\sigma_E$  and  $\ln(\sigma_E)$  for females (red) and males (blue). (a, b) Chill coma recovery time. (c, d) Startle response. (e, f) Starvation stress resistance.**

Fig. S1

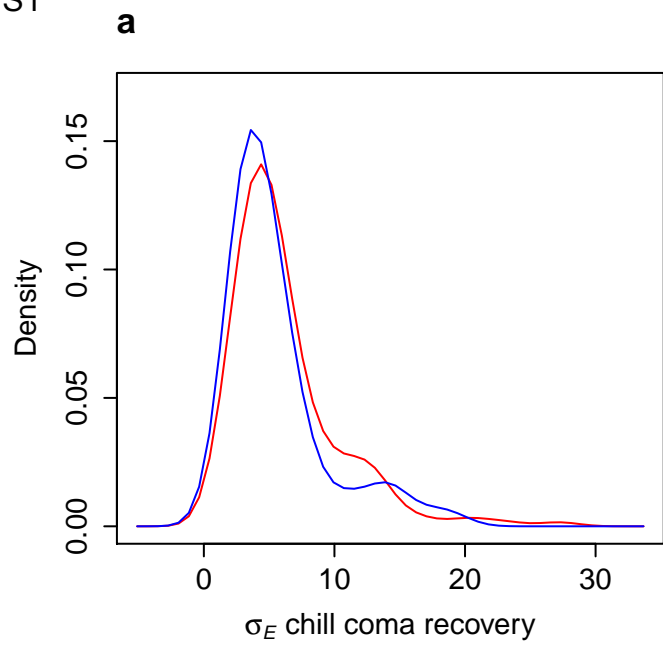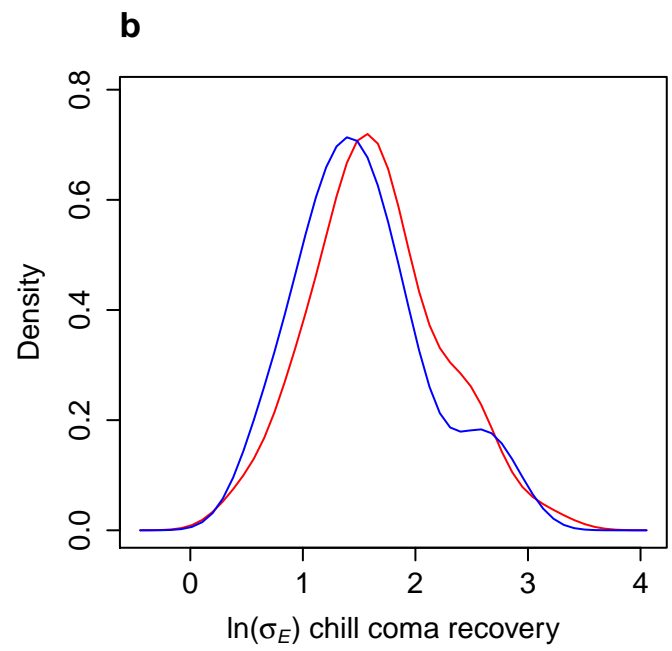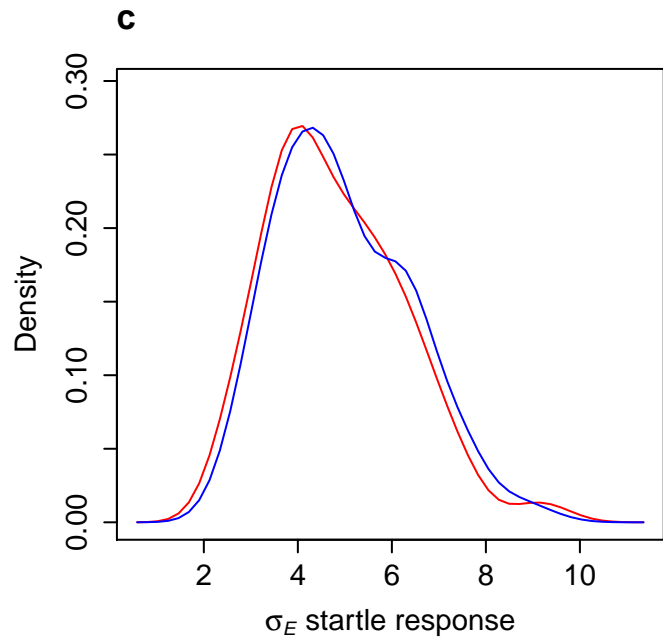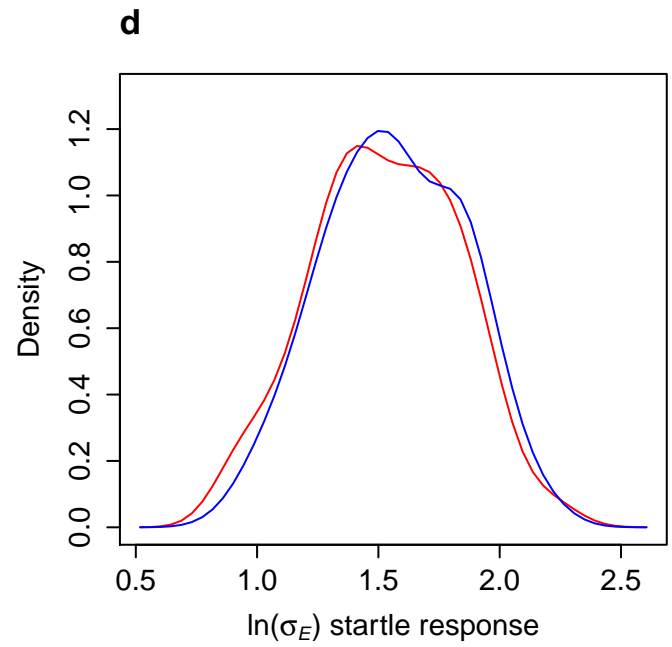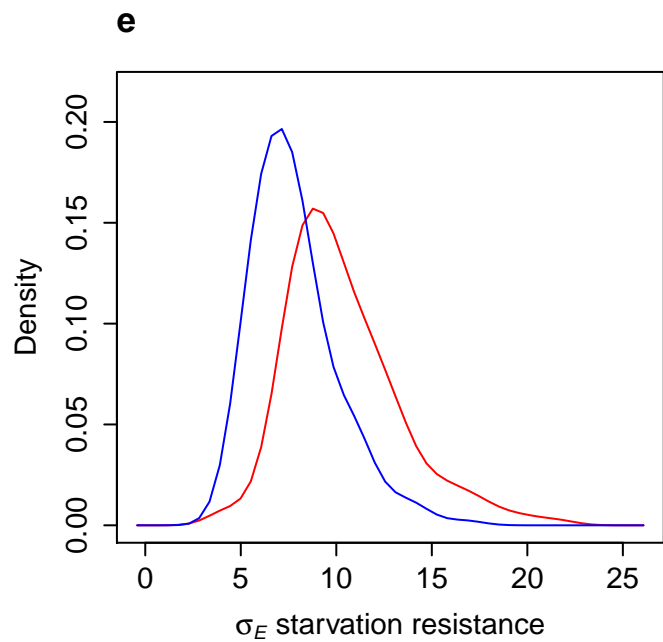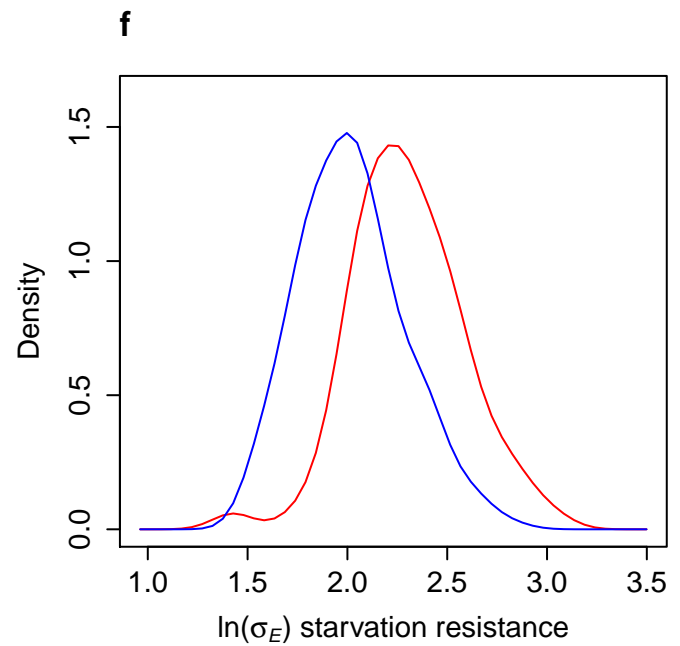

**Fig. S2| Density plots showing skewed distributions of  $CV_E$  and  $\ln(CV_E)$  for females (red) and males (blue). (a, b) Chill coma recovery time. (c, d) Startle response. (e, f) Starvation stress resistance.**

Fig. S2

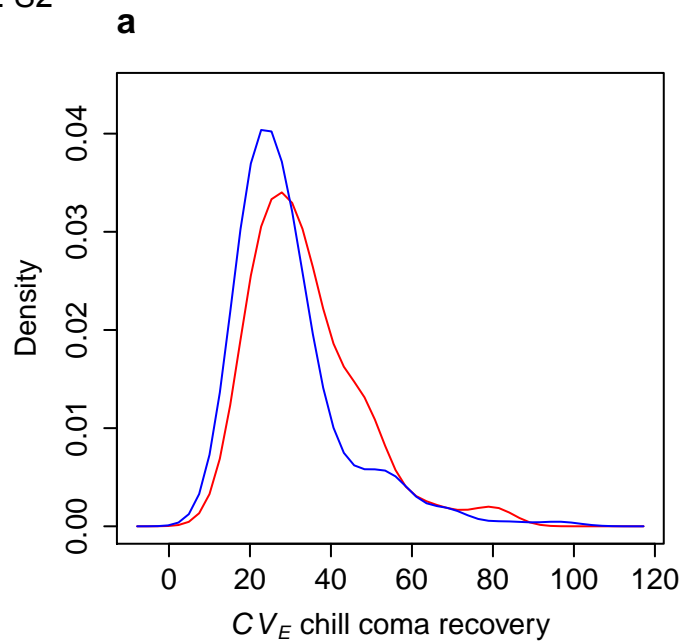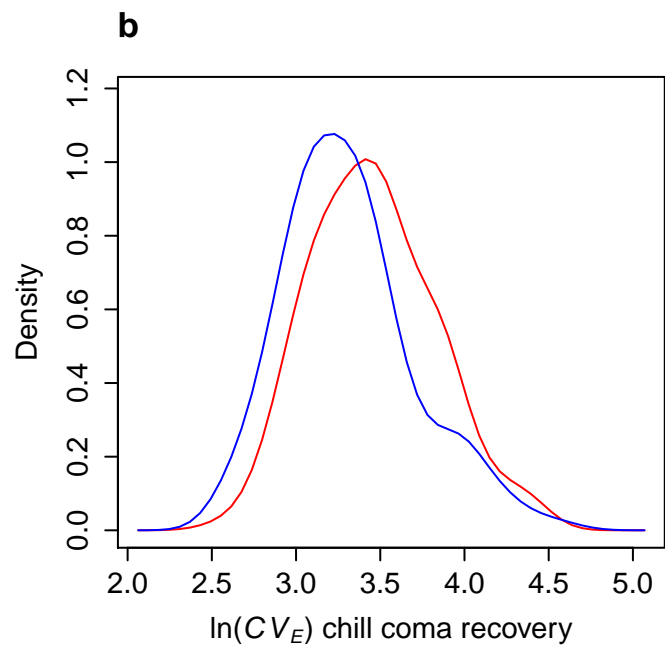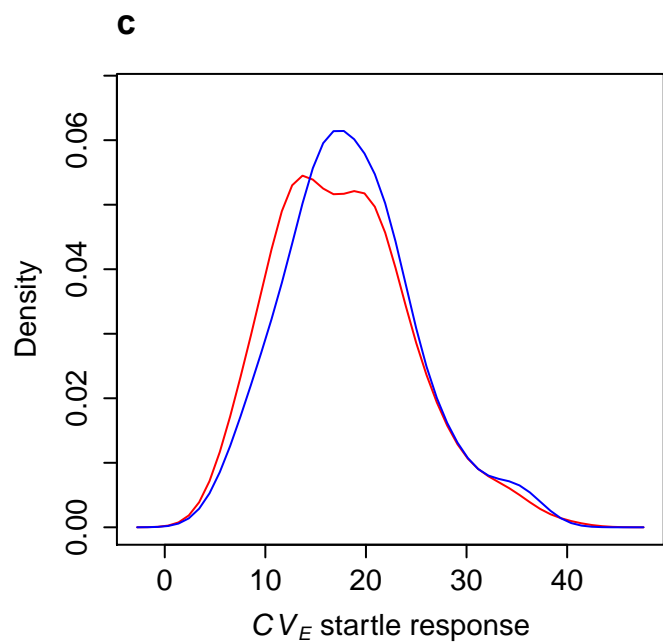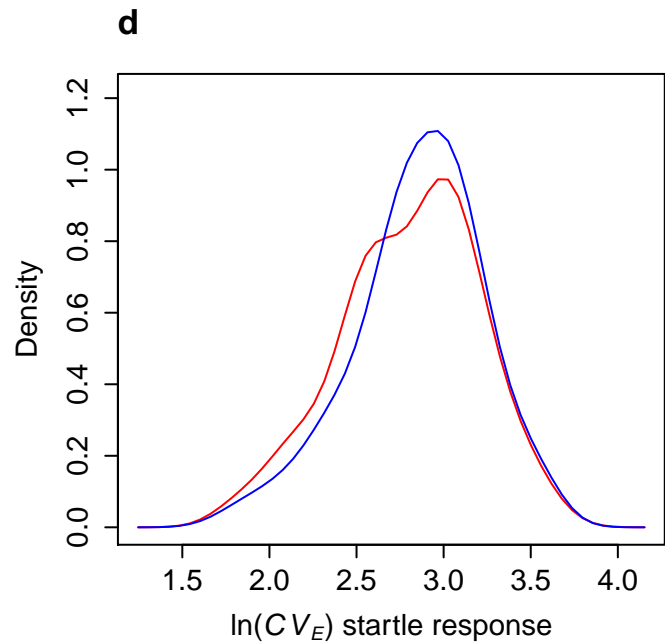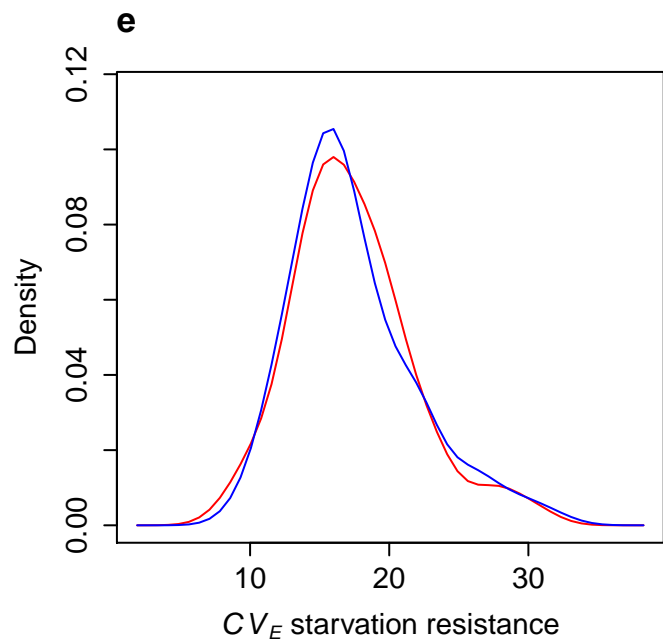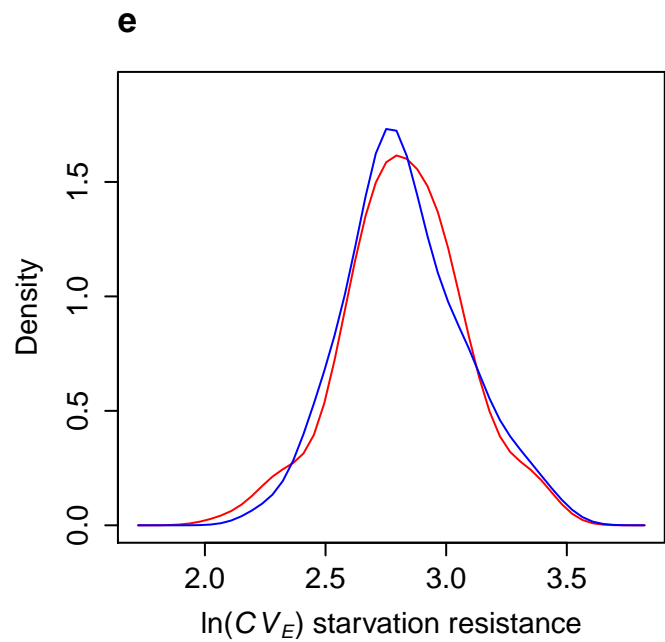

**Fig. S3| Density plots showing skewed distributions of  $MAD$  and  $\ln(MAD)$  for females (red) and males (blue). (a, b) Chill coma recovery time. (c, d) Startle response. (e, f) Starvation stress resistance.**

Fig. S3

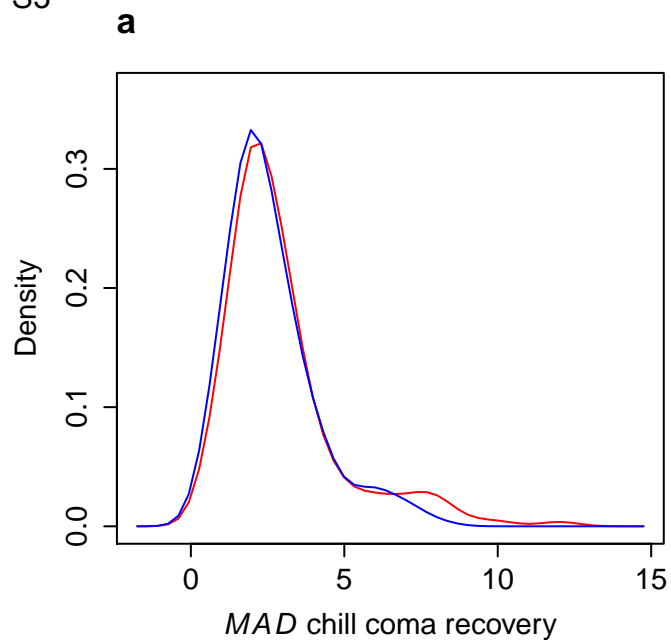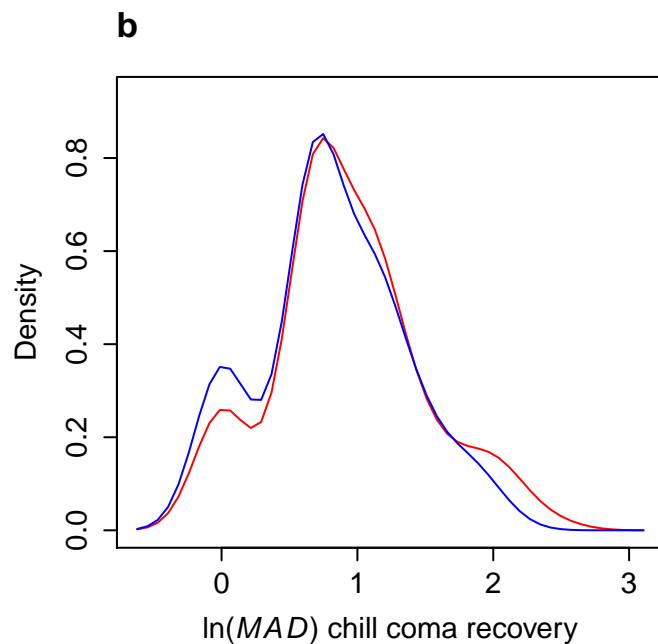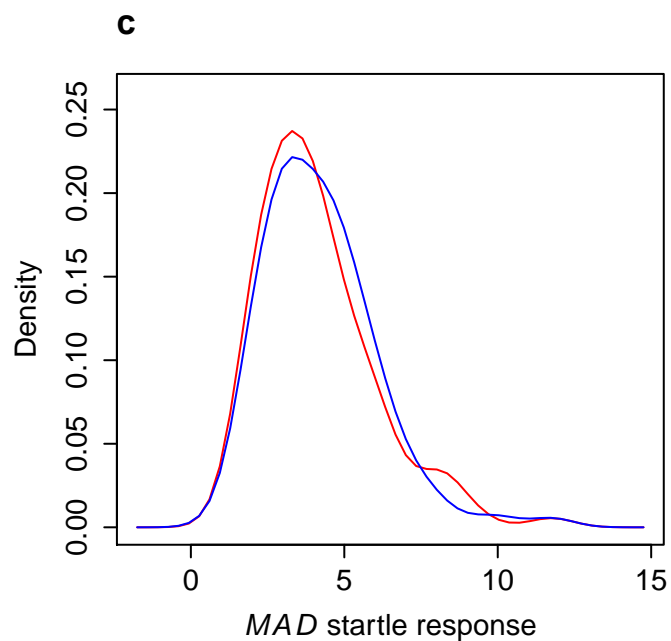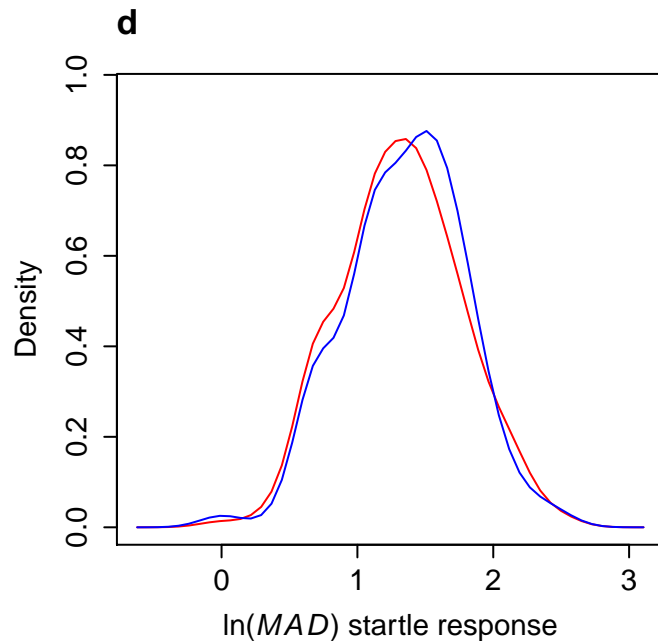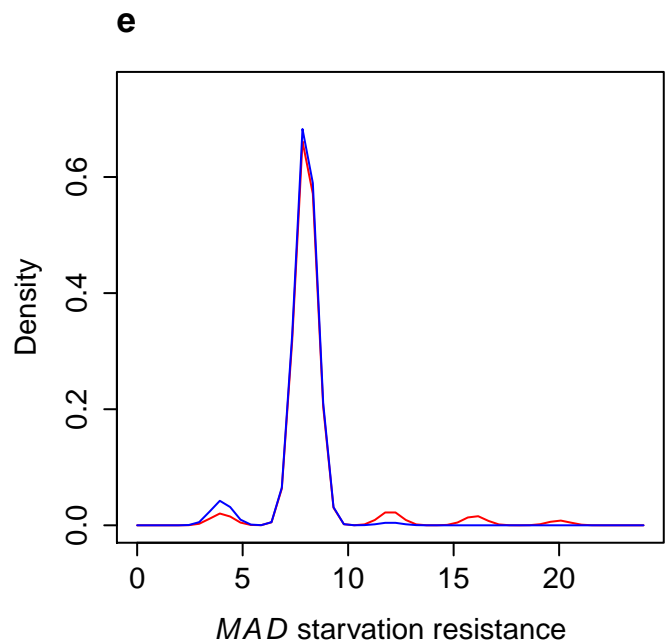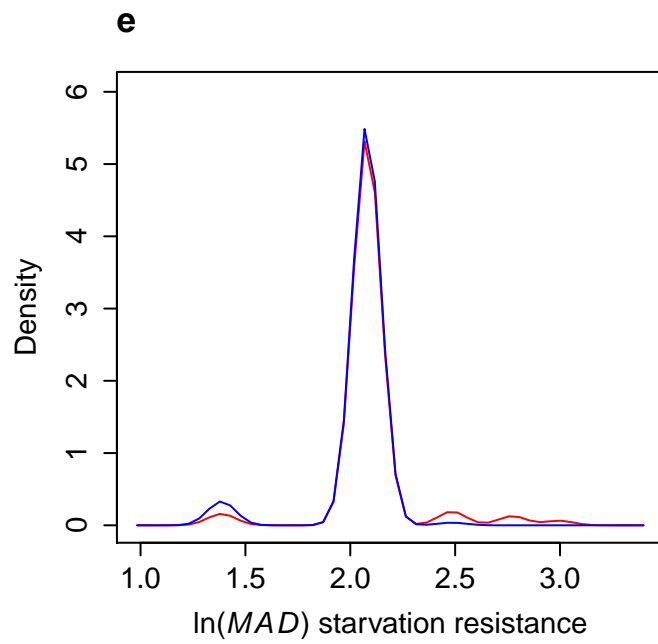

**Fig. S4| Correlations of % segregating sites and micro-environmental variances of three quantitative traits for females (red) and males (blue).** (a) Chill coma recovery time. The correlations between the % segregating sites and micro-environmental variance ( $r_{MSS}$ ) are  $r_{MSS} = -0.09$  ( $P = 0.26$ ) (females) and  $r_{MSS} = -0.08$  ( $P = 0.30$ ) (males). (b) Startle response.  $r_{MSS} = 0.02$  ( $P = 0.80$ ) (females),  $r_{MSS} = -0.07$  ( $P = 0.34$ ) (males). (c) Starvation resistance.  $r_{MSS} = 0.10$  ( $P = 0.15$ ) (females),  $r_{MSS} = 0.11$  ( $P = 0.13$ ) (males).



Fig. S4

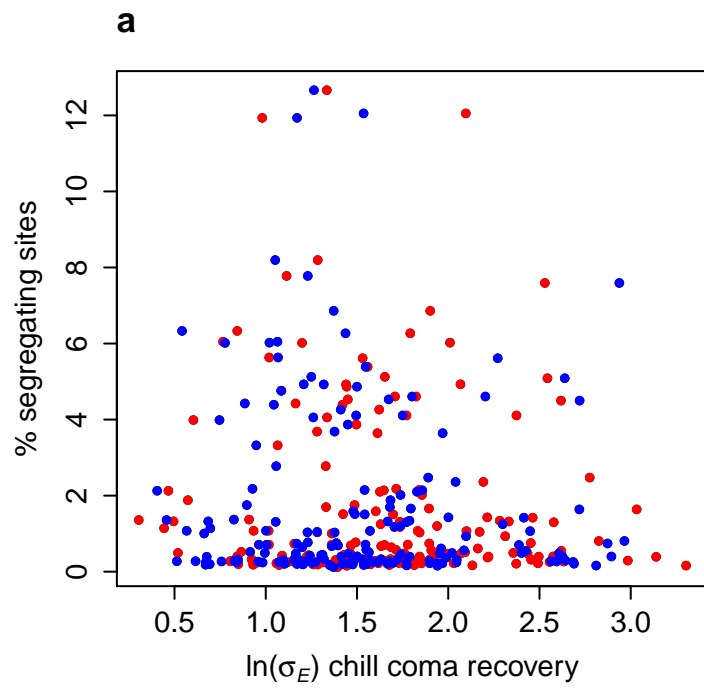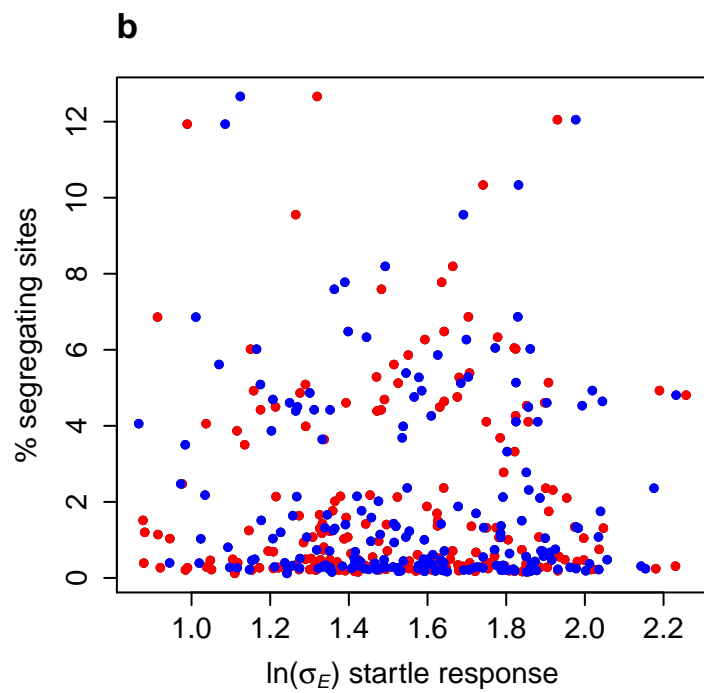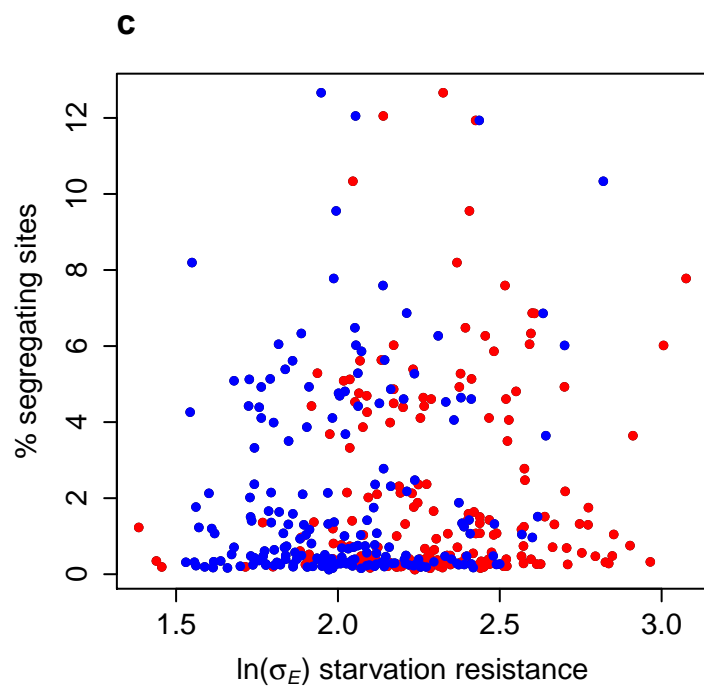

**Fig. S5| Comparison of correlations of trait means and micro-environmental plasticity for three quantitative traits using two different metrics to parameterize micro-environmental plasticity,  $\ln(\sigma_E)$  and  $\ln(CV_E)$ . Red points indicate females and blue points indicate males.**

**(a)** Mean vs  $\ln(\sigma_E)$  for chill coma recovery time [ $r_{MV} = 0.79$  ( $P < 0.0001$ ) for females and  $r_{MV} = 0.80$  ( $P < 0.0001$ ) for males]. **(b)** Mean vs  $\ln(CV_E)$  for chill coma recovery time [ $r_{MV} = 0.40$  ( $P < 0.0001$ ) for females and  $r_{MV} = 0.48$  ( $P < 0.0001$ ) for males]. **(c)** Mean vs  $\ln(\sigma_E)$  for startle response [ $r_{MV} = -0.12$  ( $P = 0.10$ ) for females and  $r_{MV} = -0.03$  ( $P = 0.70$ ) for males]. **(d)** Mean vs  $\ln(CV_E)$  for startle response [ $r_{MV} = -0.68$  ( $P < 0.0001$ ) for females and  $r_{MV} = -0.66$  ( $P < 0.0001$ ) for males]. **(e)** Mean vs  $\ln(\sigma_E)$  for starvation resistance [ $r_{MV} = 0.50$  ( $P < 0.0001$ ) for females and  $r_{MV} = 0.50$  ( $P < 0.0001$ ) for males]. **(f)** Mean vs  $\ln(CV_E)$  for starvation resistance [ $r_{MV} = -0.27$  ( $P < 0.0001$ ) for females and  $r_{MV} = -0.33$  ( $P < 0.0001$ ) for males].

Fig. S5

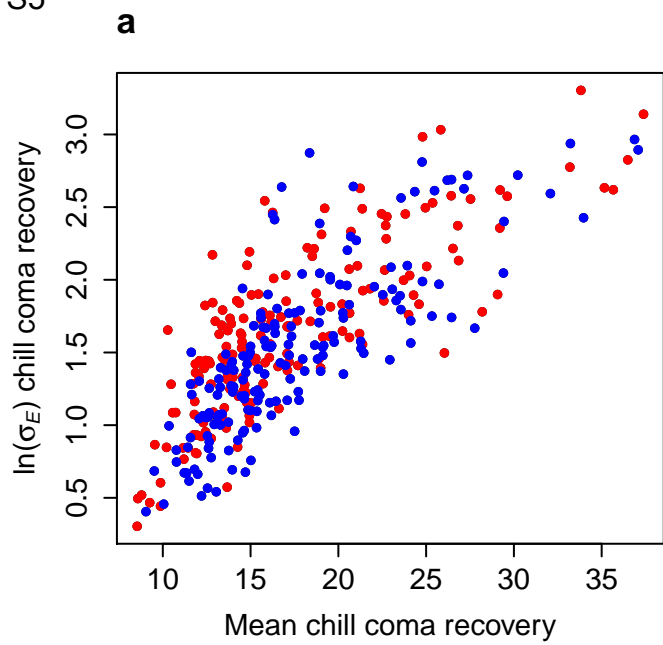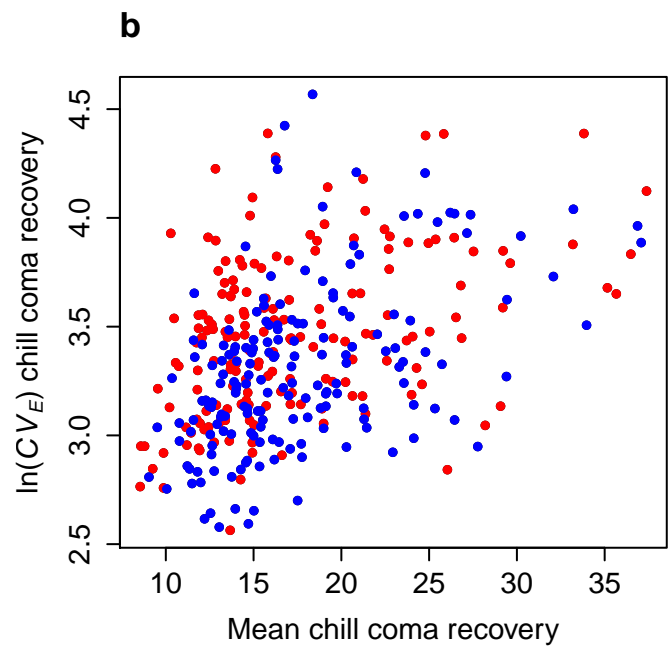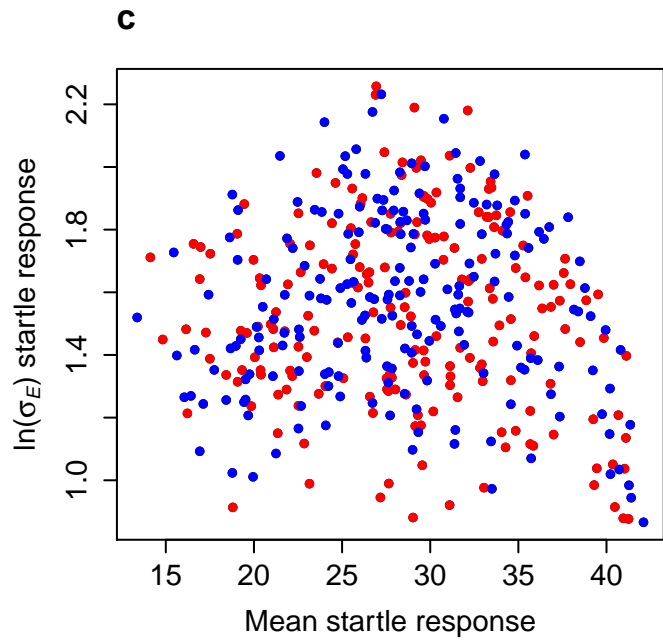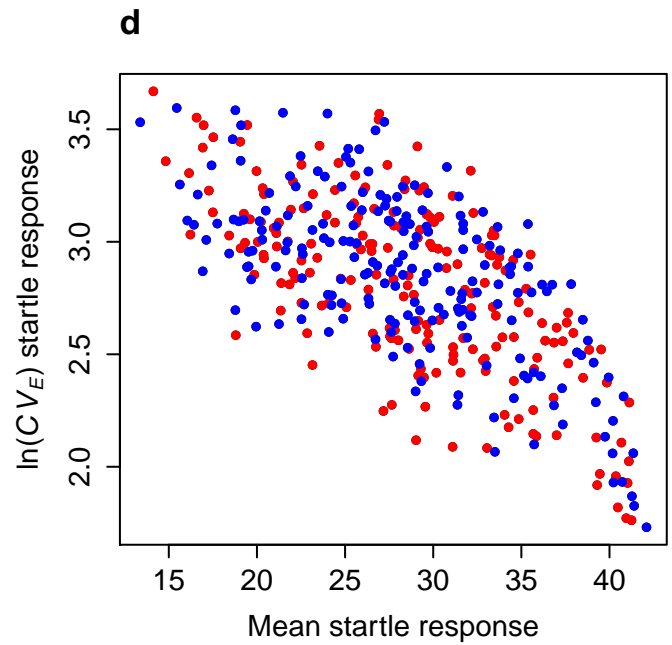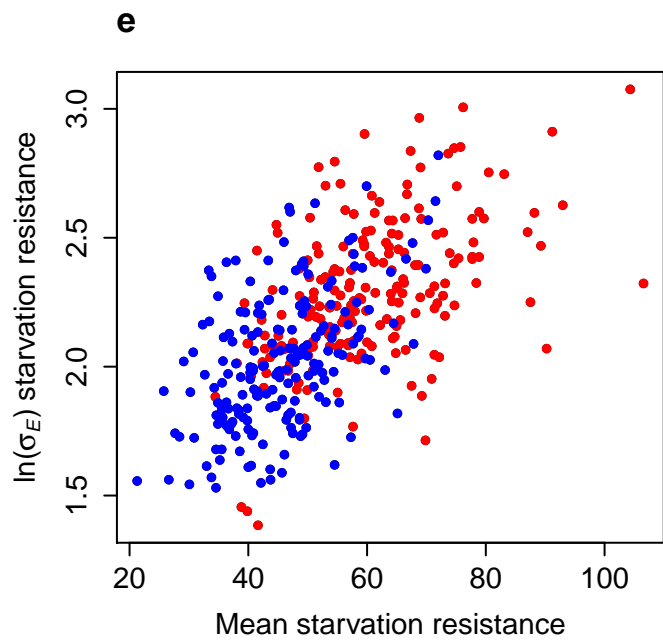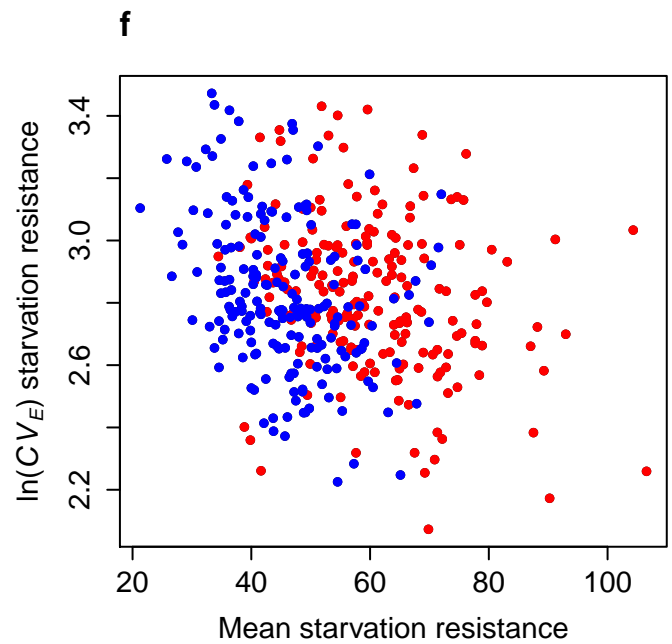

**Fig. S6| Correlations of micro-environmental variance between pairs of quantitative traits for females (red) and males (blue).** (a) Chill coma recovery time and startle response.  $r = -0.02$  ( $P = 0.81$ ) (females),  $r = -0.07$  ( $P = 0.39$ ) (males). (b) Chill coma recovery and starvation resistance.  $r = 0.08$  ( $P = 0.29$ ) (females),  $r = 0.03$  ( $P = 0.71$ ) (males). (c) startle response and starvation resistance.  $r = 0.06$  ( $P = 0.40$ ) (females),  $r = 0.005$  ( $P = 0.94$ ) (males).

Fig. S6

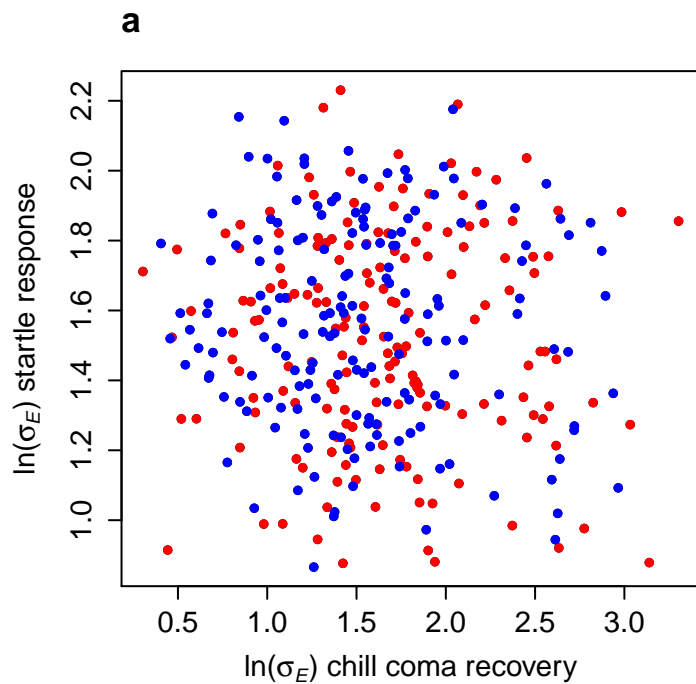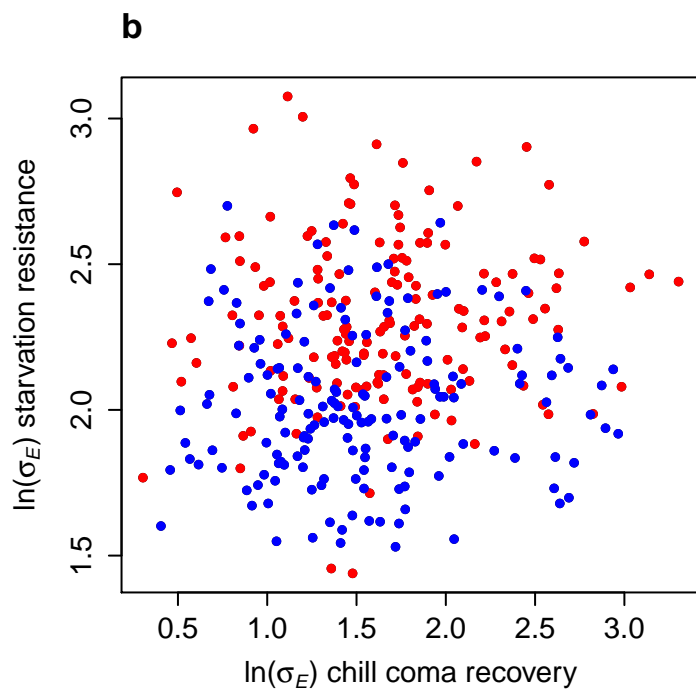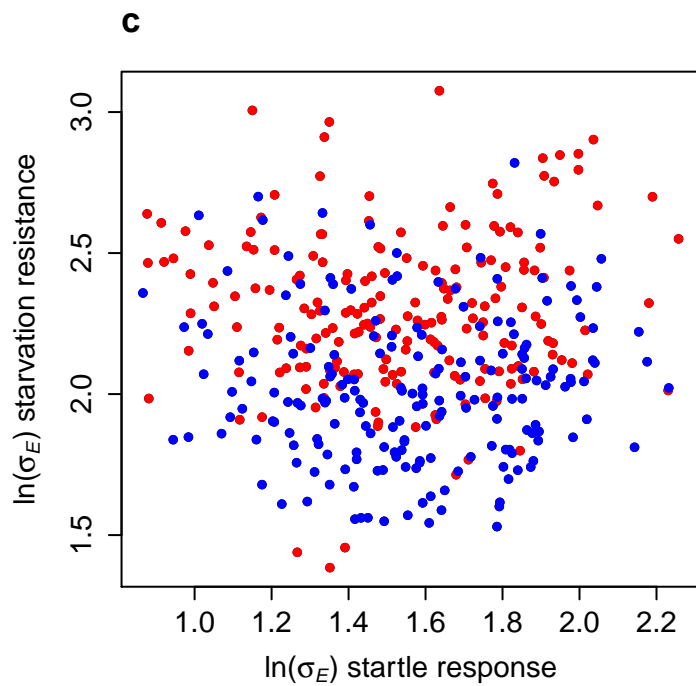

**Fig. S7| Molecular variants associated with  $\ln(\sigma_E)$  in or near ( $\pm 1$  kb) *Hsp83* for females (red) and males (blue).** The y-axis gives  $-\log_{10}(P\text{-values})$  for each variant. The dashed line gives the Bonferroni threshold corresponding to an experiment-wise  $P$ -value of 0.05. **(a)** Chill coma recovery time. **(b)** Starvation resistance.

Fig. S7

**a**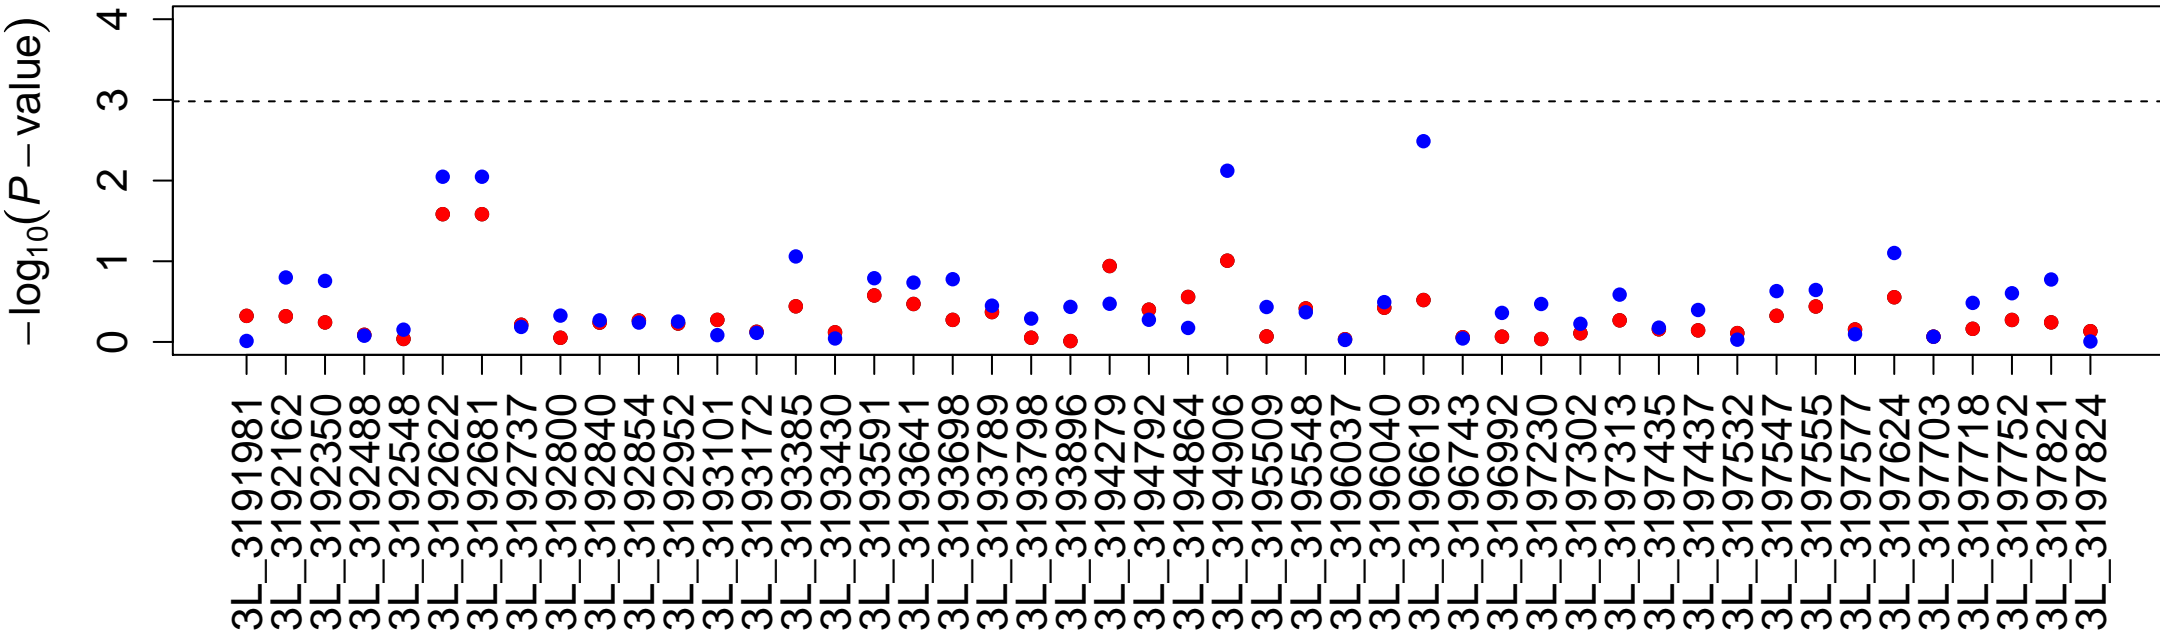**b**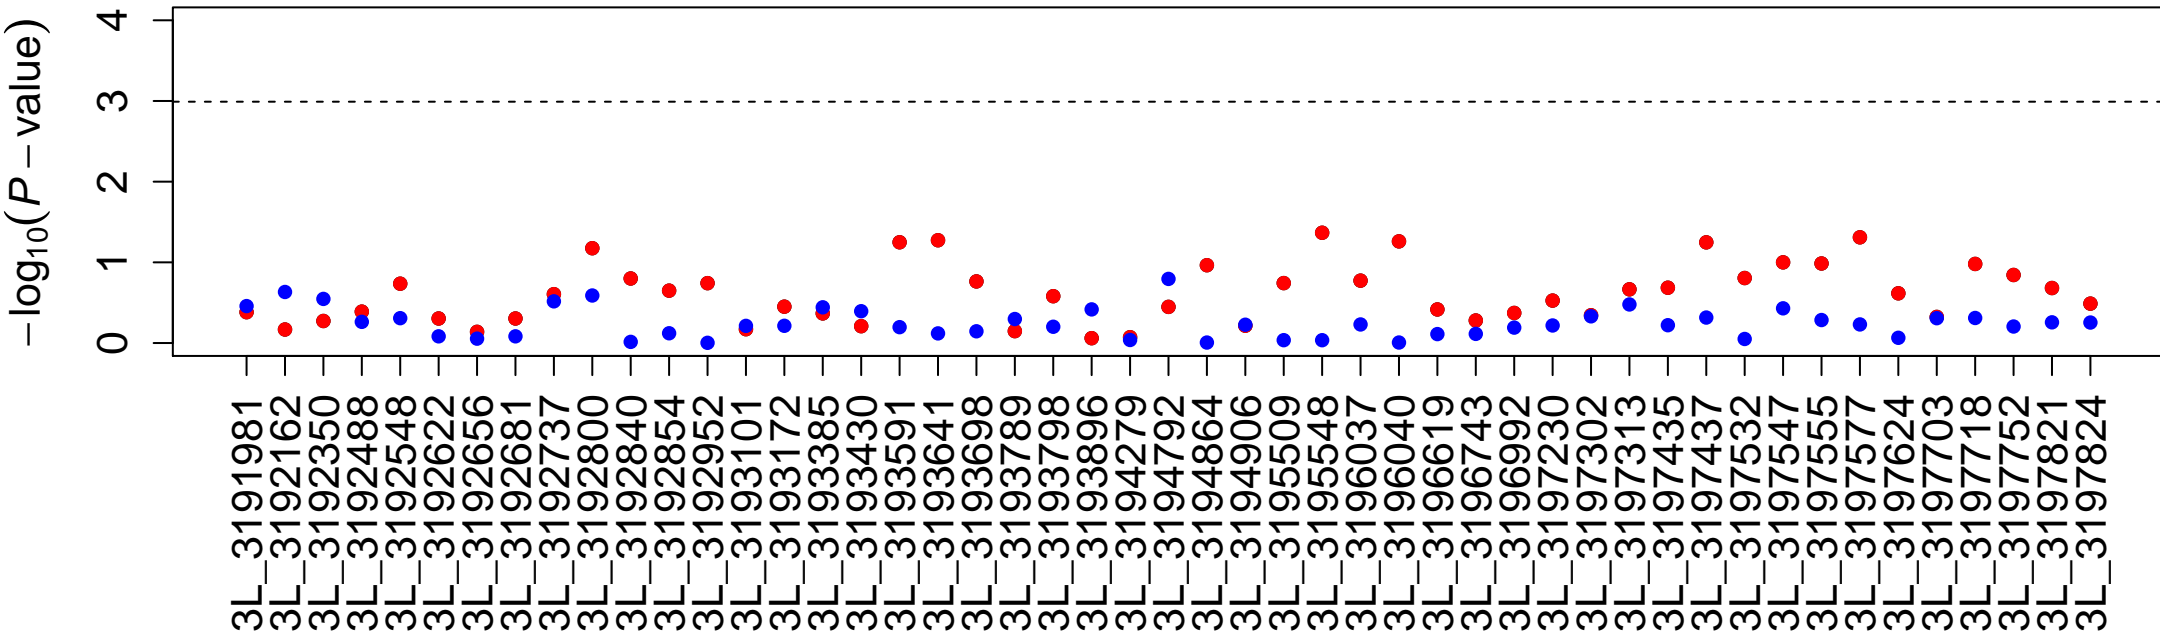

**Fig. S8| Q-Q plots of  $-\log_{10}(P\text{-values})$  from GWA analyses of  $\ln(\sigma_E)$  (y-axis) and expected under a uniform distribution (x-axis). (a) Chill coma recovery time, females, (b) Chill coma recovery time, males. (c) Startle response, females. (d) Startle response, males. (e) Starvation resistance, females. (f) Starvation resistance, males.**



Fig. S8

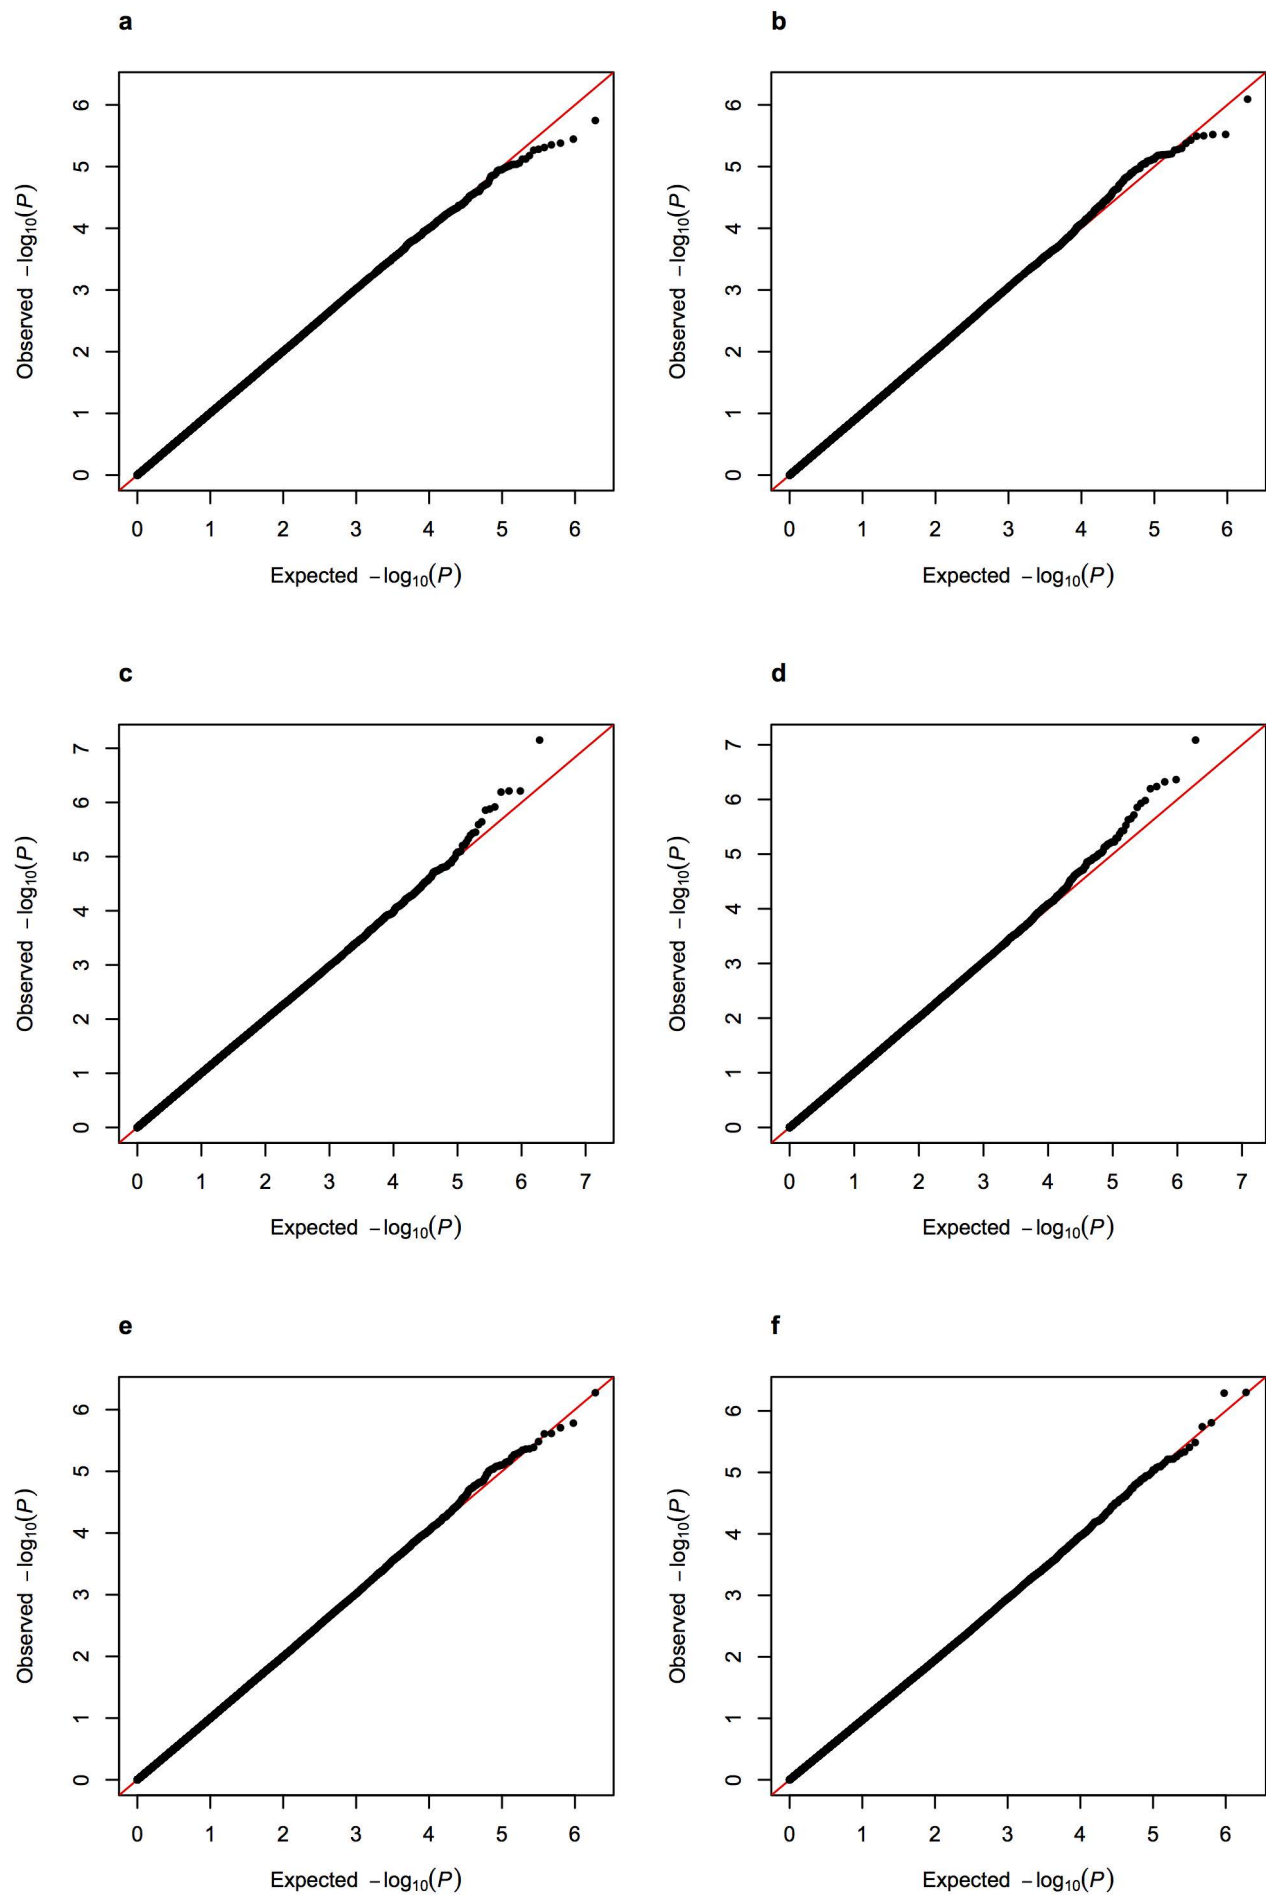

**Table S1| Pearson's  $\chi^2$  tests for normality.**

| <b>Metric</b>   | <b>Analysis</b> | <b>Trait</b>          | <b>P</b> | <b>P-value</b> |
|-----------------|-----------------|-----------------------|----------|----------------|
| $\sigma_E$      | Females         | Chill coma recovery   | 82.368   | <0.0001        |
|                 |                 | Startle response      | 20.338   | 0.120          |
|                 |                 | Starvation resistance | 47.817   | <0.0001        |
|                 | Males           | Chill coma recovery   | 108.851  | <0.0001        |
|                 |                 | Startle response      | 26.597   | 0.022          |
|                 |                 | Starvation resistance | 41.777   | 0.0001         |
| $\ln(\sigma_E)$ | Females         | Chill coma recovery   | 18.553   | 0.138          |
|                 |                 | Startle response      | 12.050   | 0.602          |
|                 |                 | Starvation resistance | 22.792   | 0.064          |
|                 | Males           | Chill coma recovery   | 23.885   | 0.032          |
|                 |                 | Startle response      | 18.139   | 0.200          |
|                 |                 | Starvation resistance | 20.548   | 0.114          |
| $CV_E$          | Females         | Chill coma recovery   | 46.690   | <0.0001        |
|                 |                 | Startle response      | 24.229   | 0.043          |
|                 |                 | Starvation resistance | 22.964   | 0.061          |
|                 | Males           | Chill coma recovery   | 84.575   | <0.0001        |
|                 |                 | Startle response      | 21.184   | 0.097          |
|                 |                 | Starvation resistance | 49.716   | <0.0001        |
| $\ln(CV_E)$     | Females         | Chill coma recovery   | 14.506   | 0.339          |
|                 |                 | Startle response      | 21.184   | 0.097          |
|                 |                 | Starvation resistance | 18.822   | 0.172          |
|                 | Males           | Chill coma recovery   | 23.333   | 0.038          |
|                 |                 | Startle response      | 15.940   | 0.317          |
|                 |                 | Starvation resistance | 24.518   | 0.040          |
| $MAD$           | Females         | Chill coma recovery   | 418.000  | <0.0001        |
|                 |                 | Startle response      | 161.582  | <0.0001        |
|                 |                 | Starvation resistance | 2286.467 | <0.0001        |
|                 | Males           | Chill coma recovery   | 480.713  | <0.0001        |
|                 |                 | Startle response      | 171.562  | <0.0001        |
|                 |                 | Starvation resistance | 1889.513 | <0.0001        |
| $\ln(MAD)$      | Females         | Chill coma recovery   | 418.000  | <0.0001        |
|                 |                 | Startle response      | 162.090  | <0.0001        |
|                 |                 | Starvation resistance | 197.000  | <0.0001        |
|                 | Males           | Chill coma recovery   | 475.195  | <0.0001        |
|                 |                 | Startle response      | 169.194  | <0.0001        |
|                 |                 | Starvation resistance | 197.000  | <0.0001        |

**Table S2| Quantitative genetic analysis of variance in micro-environmental plasticity for three traits, pooled across sexes.** df: degrees of freedom; MS: Mean squares; F: F-ratio test;  $\sigma^2$  (s.e.): variance component (standard error);  $H^2$ : broad sense heritability;  $r_{GMF}$ : Cross-sex genetic correlation. Variance components given as -0.000 were negative.

| Trait                 | Analysis     | Source   | df    | MS    | F      | P-value       | $\sigma^2$ (s.e.) | $H^2$ | $r_{GMF}$ |
|-----------------------|--------------|----------|-------|-------|--------|---------------|-------------------|-------|-----------|
| Chill coma recovery   | Sexes pooled | Sex      | 1     | 2.78  | 23.80  | < 0.0001      | N/A               | 0.75  | 0.94      |
|                       |              | Line     | 173   | 1.15  | 9.81   | < 0.0001      | 0.258 (0.031)     |       |           |
|                       |              | Sex×Line | 173   | 0.12  | 1.33   | 0.0127        | 0.015 (0.007)     |       |           |
|                       |              | Error    | 348   | 0.09  |        | 0.088 (0.007) |                   |       |           |
|                       | Females      | Line     | 173   | 0.65  | 7.70   | < 0.0001      | 0.281 (0.035)     | 0.77  |           |
|                       |              | Error    | 174   | 0.08  |        |               | 0.084 (0.009)     |       |           |
|                       | Males        | Line     | 173   | 0.62  | 6.79   | < 0.0001      | 0.263 (0.034)     | 0.74  |           |
|                       |              | Error    | 174   | 0.09  |        |               | 0.091 (0.010)     |       |           |
| Startle response      | Sexes pooled | Sex      | 1     | 0.31  | 7.24   | 0.0077        | N/A               | 0.54  | 1.00      |
|                       |              | Line     | 200   | 0.30  | 6.94   | < 0.0001      | 0.064 (0.007)     |       |           |
|                       |              | Sex×Line | 200   | 0.04  | 0.78   | 0.9735        | -0.000 (0.003)    |       |           |
|                       |              | Error    | 402   | 0.05  |        | 0.055 (0.004) |                   |       |           |
|                       | Females      | Line     | 200   | 0.17  | 3.08   | < 0.0001      | 0.059 (0.009)     | 0.51  |           |
|                       |              | Error    | 201   | 0.06  |        |               | 0.057 (0.006)     |       |           |
|                       | Males        | Line     | 200   | 0.16  | 3.17   | < 0.0001      | 0.056 (0.009)     | 0.52  |           |
|                       |              | Error    | 201   | 0.05  |        |               | 0.052 (0.005)     |       |           |
| Starvation resistance | Sexes pooled | Sex      | 1     | 35.78 | 183.13 | < 0.0001      | N/A               | 0.36  | 0.58      |
|                       |              | Line     | 196   | 0.48  | 2.48   | < 0.0001      | 0.029 (0.005)     |       |           |
|                       |              | Sex×Line | 196   | 0.19  | 2.22   | < 0.0001      | 0.021 (0.004)     |       |           |
|                       |              | Error    | 1,571 | 0.09  |        | 0.088 (0.003) |                   |       |           |
|                       | Females      | Line     | 196   | 0.36  | 3.83   | < 0.0001      | 0.054 (0.007)     | 0.36  |           |
|                       |              | Error    | 786   | 0.09  |        |               | 0.095 (0.005)     |       |           |
|                       | Males        | Line     | 196   | 0.31  | 3.84   | < 0.0001      | 0.047 (0.006)     | 0.36  |           |
|                       |              | Error    | 785   | 0.08  |        |               | 0.082 (0.004)     |       |           |

**Table S3| Quantitative genetic analyses of variance in micro-environmental plasticity using different metrics to parameterise micro-environmental plasticity. (a) Analyses of untransformed data. (b) Analyses of ln-transformed data. df: degrees of freedom; F: F-ratio test;  $\sigma^2$ : variance component;  $H^2$ : broad sense heritability. Variance components given as -0.000 were negative.**

| <b>a</b>              |              |          | $CV_E$ |         |            |       | $MAD$ |         |            |       | $\sigma_E$ |         |            |       |
|-----------------------|--------------|----------|--------|---------|------------|-------|-------|---------|------------|-------|------------|---------|------------|-------|
| Trait                 | Analysis     | Source   | F      | P-value | $\sigma^2$ | $H^2$ | F     | P-value | $\sigma^2$ | $H^2$ | F          | P-value | $\sigma^2$ | $H^2$ |
| Chill coma recovery   | Sexes pooled | Sex      | 36.97  | <0.0001 | N/A        |       | 12.42 | 0.0005  | N/A        |       | 12.81      | 0.0004  | N/A        |       |
|                       |              | Line     | 5.86   | <0.0001 | 111.440    | 0.61  | 6.60  | <0.0001 | 1.888      | 0.72  | 8.03       | <0.0001 | 11.487     | 0.73  |
|                       |              | Sex×Line | 1.21   | 0.071   | 7.923      |       | 1.64  | <0.0001 | 0.262      |       | 1.41       | 0.004   | 0.956      |       |
|                       |              | Error    |        |         | 75.859     |       |       |         | 0.825      |       |            |         | 4.624      |       |
|                       | Females      | Line     | 4.31   | <0.0001 | 124.056    |       | 0.62  | 10.46   | <0.0001    |       | 2.801      | 0.83    | 7.82       |       |
|                       |              | Error    |        |         | 74.921     |       |       |         | 0.592      |       |            |         | 4.139      |       |
|                       | Males        | Line     | 3.99   | <0.0001 | 114.669    | 0.60  | 3.84  | <0.0001 | 1.500      | 0.59  | 5.22       | <0.0001 | 10.772     | 0.68  |
|                       |              | Error    |        |         | 76.796     |       |       |         | 1.057      |       |            |         | 5.109      |       |
| Startle response      | Sexes pooled | Sex      | 6.70   | 0.010   | N/A        |       | 10.68 | 0.001   | N/A        |       | 6.23       | 0.013   | N/A        |       |
|                       |              | Line     | 10.12  | <0.0001 | 35.312     | 0.47  | 5.23  | <0.0001 | 0.920      | 0.43  | 7.59       | <0.0001 | 1.530      | 0.51  |
|                       |              | Sex×Line | 0.5    | 1       | -0.000     |       | 0.8   | 0.960   | -0.000     |       | 0.72       | 0.995   | -0.000     |       |
|                       |              | Error    |        |         | 31.165     |       |       |         | 1.085      |       |            |         | 1.286      |       |
|                       | Females      | Line     | 2.51   | <0.0001 | 26.588     |       | 0.43  | 2.27    | <0.0001    |       | 0.708      | 0.39    | 3.03       |       |
|                       |              | Error    |        |         | 35.209     |       |       |         | 1.113      |       |            |         | 1.325      |       |
|                       | Males        | Line     | 3.09   | <0.0001 | 28.355     | 0.51  | 2.74  | <0.0001 | 0.919      | 0.46  | 3.17       | <0.0001 | 1.353      | 0.52  |
|                       |              | Error    |        |         | 27.121     |       |       |         | 1.057      |       |            |         | 1.248      |       |
| Starvation resistance | Sexes pooled | Sex      | 0.22   | 0.638   | N/A        |       | 35.03 | <0.0001 | N/A        |       | 196.06     | <0.0001 | N/A        |       |
|                       |              | Line     | 1.86   | <0.0001 | 5.472      | 0.29  | 1.55  | 0.001   | 0.500      | 0.08  | 2.39       | <0.0001 | 2.522      | 0.37  |
|                       |              | Sex×Line | 2.12   | <0.0001 | 6.756      |       | 1.03  | 0.392   | 0.048      |       | 2.3        | <0.0001 | 2.055      |       |
|                       |              | Error    |        |         | 29.977     |       |       |         | 6.228      |       |            |         | 7.872      |       |
|                       | Females      | Line     | 2.75   | <0.0001 | 10.921     |       | 0.26  | 1.49    | 0.0001     |       | 0.828      | 0.10    | 3.79       |       |
|                       |              | Error    |        |         | 31.217     |       |       |         | 7.26       |       |            |         | 10.570     |       |
|                       | Males        | Line     | 3.34   | <0.0001 | 13.454     | 0.32  | 1.35  | 0.005   | 0.499      | 0.09  | 4.11       | <0.0001 | 3.211      | 0.38  |
|                       |              | Error    |        |         | 28.736     |       |       |         | 4.791      |       |            |         | 5.170      |       |

| <b>b</b>              |                 |               | <b>ln(CV<sub>E</sub>)</b> |                |                      |                      | <b>ln(MAD)</b> |                |                      |                      | <b>ln(σ<sub>E</sub>)</b> |                |                      |                      |          |
|-----------------------|-----------------|---------------|---------------------------|----------------|----------------------|----------------------|----------------|----------------|----------------------|----------------------|--------------------------|----------------|----------------------|----------------------|----------|
| <b>Trait</b>          | <b>Analysis</b> | <b>Source</b> | <b>F</b>                  | <b>P-value</b> | <b>σ<sup>2</sup></b> | <b>H<sup>2</sup></b> | <b>F</b>       | <b>P-value</b> | <b>σ<sup>2</sup></b> | <b>H<sup>2</sup></b> | <b>F</b>                 | <b>P-value</b> | <b>σ<sup>2</sup></b> | <b>H<sup>2</sup></b> |          |
| Chill coma recovery   | Sexes pooled    | Sex           | 56.48                     | <0.0001        | N/A                  |                      | 13.43          | 0.0003         | N/A                  |                      | 23.80                    | < 0.0001       | N/A                  |                      |          |
|                       |                 | Line          | 6.22                      | <0.0001        | 0.091                | 0.63                 | 7.07           | <0.0001        | 0.209                | 0.71                 | 9.81                     | < 0.0001       | 0.258                | 0.75                 |          |
|                       |                 | Sex×Line      | 1.22                      | 0.064          | 0.006                |                      | 1.45           | 0.002          | 0.021                |                      | 1.33                     | 0.013          | 0.015                |                      |          |
|                       |                 | Error         |                           |                | 0.058                |                      |                |                | 0.007                |                      |                          |                | 0.088                |                      |          |
|                       | Females         | Line          | 4.46                      | <0.0001        | 0.097                |                      | 0.63           | 7.33           | <0.0001              |                      | 0.259                    | 0.76           | 7.70                 |                      | < 0.0001 |
|                       |                 | Error         |                           |                | 0.056                |                      |                |                | 0.082                |                      |                          |                | 0.084                |                      |          |
|                       |                 | Males         | Line                      | 4.27           | <0.0001              | 0.098                | 0.62           | 4.72           | <0.0001              | 0.201                | 0.65                     | 6.79           | < 0.0001             | 0.263                | 0.74     |
|                       |                 | Error         |                           |                | 0.06                 |                      |                |                | 0.012                |                      |                          |                | 0.091                |                      |          |
| Startle response      | Sexes pooled    | Sex           | 11.46                     | 0.0009         | N/A                  |                      | 12.13          | 0.0006         | N/A                  |                      | 7.24                     | 0.0077         | N/A                  |                      |          |
|                       |                 | Line          | 10.45                     | <0.0001        | 0.122                | 0.51                 | 4.67           | <0.0001        | 0.079                | 0.39                 | 6.94                     | < 0.0001       | 0.064                | 0.54                 |          |
|                       |                 | Sex×Line      | 0.54                      | 1              | -0.000               |                      | 0.81           | 0.955          | -0.000               |                      | 0.78                     | 0.973          | -0.000               |                      |          |
|                       |                 | Error         |                           |                | 0.095                |                      |                |                | 0.107                |                      |                          |                | 0.055                |                      |          |
|                       | Females         | Line          | 2.90                      | <0.0001        | 0.102                |                      | 0.49           | 2.00           | <0.0001              |                      | 0.06                     | 0.33           | 3.08                 |                      | < 0.0001 |
|                       |                 | Error         |                           |                | 0.108                |                      |                |                | 0.12                 |                      |                          |                | 0.057                |                      |          |
|                       |                 | Males         | Line                      | 3.37           | <0.0001              | 0.098                | 0.54           | 2.66           | <0.0001              | 0.078                | 0.45                     | 3.17           | < 0.0001             | 0.056                | 0.52     |
|                       |                 | Error         |                           |                | 0.083                |                      |                |                | 0.094                |                      |                          |                | 0.052                |                      |          |
| Starvation resistance | Sexes pooled    | Sex           | 0.41                      | 0.521          | N/A                  |                      | 30.47          | <0.0001        | N/A                  |                      | 183.13                   | < 0.0001       | N/A                  |                      |          |
|                       |                 | Line          | 1.74                      | <0.0001        | 0.015                | 0.30                 | 1.46           | 0.004          | 0.009                | 0.08                 | 2.48                     | < 0.0001       | 0.029                | 0.36                 |          |
|                       |                 | Sex×Line      | 2.28                      | <0.0001        | 0.023                |                      | 1.05           | 0.310          | 0.002                |                      | 2.22                     | < 0.0001       | 0.021                |                      |          |
|                       |                 | Error         |                           |                | 0.091                |                      |                |                | 0.139                |                      |                          |                | 0.088                |                      |          |
|                       | Females         | Line          | 2.91                      | <0.0001        | 0.037                |                      | 0.28           | 1.41           | 0.001                |                      | 0.014                    | 0.08           | 3.83                 |                      | < 0.0001 |
|                       |                 | Error         |                           |                | 0.096                |                      |                |                | 0.149                |                      |                          |                | 0.095                |                      |          |
|                       |                 | Males         | Line                      | 3.36           | <0.0001              | 0.040                | 0.32           | 1.33           | 0.007                | 0.012                | 0.09                     | 3.84           | < 0.0001             | 0.047                | 0.36     |
|                       |                 | Error         |                           |                | 0.004                |                      |                |                | 0.124                |                      |                          |                | 0.082                |                      |          |

**Table S4| Quantitative genetic analysis of variance in micro-environmental plasticity for males and females, pooled across traits.** df: degrees of freedom; MS: Mean squares; F: F-ratio test;  $\sigma^2$  (s.e.): variance component (standard error);  $H^2$ : broad sense heritability;  $r_{GT}$ : Cross-trait genetic correlation. Variance components given as -0.000 were negative.

| <b>Analysis</b> | <b>Source</b> | <b>df</b> | <b>MS</b> | <b>F</b> | <b>P-value</b> | <b><math>\sigma^2</math></b> | <b><math>r_{GT}</math></b> |
|-----------------|---------------|-----------|-----------|----------|----------------|------------------------------|----------------------------|
| Females         | Trait         | 2         | 94.67     | 254.68   | < 0.0001       | N/A                          | 0.04                       |
|                 | Line          | 204       | 0.40      | 1.10     | 0.2252         | 0.005                        |                            |
|                 | Trait×Line    | 365       | 0.37      | 4.33     | < 0.0001       | 0.108                        |                            |
|                 | Error         | 1,161     | 0.09      |          |                | 0.086                        |                            |
| Males           | Trait         | 2         | 40.70     | 112.34   | < 0.0001       | N/A                          | 0.00                       |
|                 | Line          | 204       | 0.34      | 0.97     | 0.5794         | -0.000                       |                            |
|                 | Trait×Line    | 365       | 0.36      | 4.68     | < 0.0001       | 0.108                        |                            |
|                 | Error         | 1,160     | 0.08      |          |                | 0.078                        |                            |

**Data file S1| Data file used for the analyses.** (a) Replicate means for ANOVA. (b) Pooled means for GWA analyses.

**Data file S2| GWA analyses for  $\ln(\sigma_E)$  of three quantitative traits.** All variants significant at a nominal  $P$ -value  $< 10^{-5}$  in any test (females, males, sex average and sex difference) are listed. Effects are one-half the mean difference in  $\ln(\sigma_E)$  between the major and minor allele classes.
